# Supplementary material
Source: MDPI journal article supplement (https://www.mdpi.com/2076-3263/14/5/138)
Supplement: s1 [file s1]

**Table S1.** Contents of major and trace elements of the Guangtoushan and Miba plutons.

| Sample No.                                  | Guangtoushan pluton |         |         |         |         |         |         |         |         |         |         |         |         | Miba pluton |        |        |        |        |        |        |        |
|---------------------------------------------|---------------------|---------|---------|---------|---------|---------|---------|---------|---------|---------|---------|---------|---------|-------------|--------|--------|--------|--------|--------|--------|--------|
|                                             | GTS1501             | GTS1502 | GTS1504 | GTS1505 | GTS1507 | GTS1508 | GTS1509 | GTS1510 | GTS1503 | GTS1506 | GTS1511 | GTS1512 | GTS1513 | CX1719      | CX1720 | CX1722 | CX1717 | CX1718 | CX1721 | CX1723 | CX1724 |
| Rock type                                   | MG                  | MG      | MG      | MG      | MG      | MG      | MG      | MG      | GR      | GR      | GR      | QD      | QD      | MG          | MG     | MG     | MG     | MG     | MG     | QD     | QD     |
| (wt.%)                                      |                     |         |         |         |         |         |         |         |         |         |         |         |         |             |        |        |        |        |        |        |        |
| SiO <sub>2</sub>                            | 67.97               | 71.12   | 70.95   | 71.02   | 70.53   | 68.92   | 70.49   | 69.85   | 72.23   | 74.77   | 73.46   | 62.52   | 64.82   | 66.08       | 66.92  | 67.04  | 69.78  | 69.03  | 68.48  | 62.58  | 62.56  |
| TiO <sub>2</sub>                            | 0.12                | 0.23    | 0.24    | 0.14    | 0.24    | 0.33    | 0.27    | 0.26    | 0.19    | 0.06    | 0.12    | 0.49    | 0.35    | 0.45        | 0.43   | 0.43   | 0.25   | 0.33   | 0.36   | 0.53   | 0.52   |
| Al <sub>2</sub> O <sub>3</sub>              | 18.98               | 16.58   | 16.46   | 17.34   | 17.30   | 16.93   | 16.72   | 17.24   | 15.62   | 14.58   | 15.30   | 19.08   | 18.90   | 15.54       | 15.26  | 15.43  | 16.27  | 16.07  | 16.08  | 15.92  | 15.96  |
| <sup>3</sup> Fe <sub>2</sub> O <sub>3</sub> | 0.94                | 1.82    | 1.77    | 1.09    | 1.74    | 2.24    | 1.90    | 1.82    | 1.47    | 0.72    | 1.00    | 4.30    | 2.87    | 3.27        | 3.12   | 3.10   | 1.86   | 2.28   | 2.55   | 4.31   | 4.11   |
| MnO                                         | 0.03                | 0.05    | 0.03    | 0.02    | 0.03    | 0.04    | 0.04    | 0.04    | 0.04    | 0.02    | 0.03    | 0.11    | 0.07    | 0.06        | 0.06   | 0.06   | 0.04   | 0.05   | 0.05   | 0.08   | 0.07   |
| MgO                                         | 0.25                | 0.55    | 0.53    | 0.31    | 0.51    | 0.68    | 0.41    | 0.50    | 0.42    | 0.12    | 0.25    | 2.12    | 1.72    | 1.72        | 1.77   | 1.65   | 0.57   | 0.69   | 0.90   | 3.61   | 3.38   |
| CaO                                         | 2.52                | 2.31    | 2.21    | 2.80    | 1.58    | 2.48    | 1.64    | 1.90    | 1.72    | 1.29    | 0.72    | 4.41    | 4.06    | 3.11        | 3.08   | 2.74   | 2.89   | 3.09   | 3.07   | 4.69   | 4.53   |
| BaO                                         | 0.06                | 0.10    | 0.10    | 0.09    | 0.09    | 0.12    | 0.16    | 0.11    | 0.11    | 0.14    | 0.12    | 0.09    | 0.06    | 0.10        | 0.11   | 0.11   | 0.10   | 0.10   | 0.10   | 0.13   | 0.14   |
| Na <sub>2</sub> O                           | 5.54                | 4.85    | 4.80    | 5.29    | 4.26    | 4.58    | 3.89    | 4.25    | 4.00    | 4.02    | 3.63    | 3.77    | 4.46    | 3.90        | 3.78   | 3.85   | 5.04   | 4.12   | 4.41   | 3.88   | 3.75   |
| K <sub>2</sub> O                            | 1.56                | 2.50    | 2.12    | 1.38    | 3.38    | 2.76    | 3.96    | 3.05    | 3.43    | 3.82    | 4.77    | 1.92    | 1.48    | 3.76        | 3.87   | 4.00   | 2.08   | 2.89   | 2.62   | 3.31   | 3.30   |
| P <sub>2</sub> O <sub>5</sub>               | 0.07                | 0.10    | 0.08    | 0.06    | 0.09    | 0.11    | 0.13    | 0.09    | 0.08    | 0.02    | 0.03    | 0.17    | 0.15    | 0.20        | 0.19   | 0.19   | 0.09   | 0.11   | 0.12   | 0.24   | 0.22   |
| SrO                                         | 0.10                | 0.07    | 0.09    | 0.08    | 0.04    | 0.07    | 0.04    | 0.05    | 0.06    | 0.03    | 0.03    | 0.08    | 0.08    | 0.07        | 0.06   | 0.07   | 0.09   | 0.08   | 0.07   | 0.09   | 0.08   |
| LOI                                         | 0.86                | 0.33    | 0.54    | 0.38    | 0.75    | 0.39    | 0.96    | 0.77    | 0.52    | 0.46    | 0.65    | 0.63    | 0.83    | 0.82        | 0.71   | 1.05   | 0.49   | 0.71   | 0.81   | 1.01   | 1.06   |
| Total                                       | 99.00               | 100.61  | 99.92   | 100.00  | 100.54  | 99.65   | 100.61  | 99.93   | 99.89   | 100.05  | 100.11  | 99.69   | 99.85   | 99.08       | 99.36  | 99.72  | 99.55  | 99.55  | 99.62  | 100.38 | 99.68  |
| A/NK                                        | 1.76                | 1.55    | 1.61    | 1.70    | 1.62    | 1.61    | 1.56    | 1.67    | 1.52    | 1.36    | 1.37    | 2.30    | 2.11    | 1.48        | 1.46   | 1.45   | 1.54   | 1.62   | 1.59   | 1.60   | 1.64   |
| A/CNK                                       | 1.23                | 1.11    | 1.16    | 1.13    | 1.28    | 1.13    | 1.22    | 1.25    | 1.16    | 1.11    | 1.23    | 1.17    | 1.16    | 0.96        | 0.95   | 0.98   | 1.03   | 1.03   | 1.02   | 0.86   | 0.89   |
| Na <sub>2</sub> O/K <sub>2</sub> O          | 3.55                | 1.94    | 2.26    | 3.83    | 1.26    | 1.66    | 0.98    | 1.39    | 1.17    | 1.05    | 0.76    | 1.96    | 3.01    | 1.04        | 0.98   | 0.96   | 2.42   | 1.43   | 1.68   | 1.17   | 1.14   |
| Mg <sup>#</sup>                             | 35                  | 38      | 37      | 36      | 37      | 38      | 30      | 35      | 36      | 25      | 33      | 50      | 55      | 51          | 53     | 52     | 38     | 38     | 41     | 63     | 62     |
| (ppm)                                       |                     |         |         |         |         |         |         |         |         |         |         |         |         |             |        |        |        |        |        |        |        |
| Li                                          | 50.29               | 48.00   | 30.43   | 65.79   | 99.68   | 87.14   | 79.19   | 86.91   | 38.01   | 38.90   | 30.89   | 68.69   | 35.09   | 54.48       | 47.21  | 49.51  | 28.60  | 40.85  | 37.41  | 37.08  | 28.92  |

|    |       |       |       |       |       |       |        |       |       |        |        |       |       |        |        |        |        |        |        |        |       |
|----|-------|-------|-------|-------|-------|-------|--------|-------|-------|--------|--------|-------|-------|--------|--------|--------|--------|--------|--------|--------|-------|
| Be | 2.80  | 2.90  | 1.51  | 2.34  | 3.47  | 3.03  | 2.47   | 3.10  | 1.91  | 2.02   | 5.94   | 2.88  | 2.79  | 3.32   | 3.20   | 2.87   | 1.41   | 2.12   | 1.86   | 2.54   | 1.64  |
| Sc | 3.78  | 5.33  | 3.46  | 3.21  | 4.83  | 4.67  | 5.18   | 4.51  | 4.99  | 2.99   | 7.26   | 12.46 | 4.91  | 5.94   | 5.93   | 4.98   | 3.34   | 3.70   | 4.21   | 10.19  | 8.26  |
| V  | 7.71  | 20.50 | 18.20 | 9.24  | 13.07 | 33.05 | 11.53  | 19.32 | 13.90 | 2.80   | 23.40  | 76.15 | 56.31 | 65.11  | 62.41  | 61.60  | 33.56  | 34.76  | 43.18  | 92.63  | 66.32 |
| Cr | 2.94  | 4.22  | 8.66  | 2.81  | 5.41  | 3.20  | 2.95   | 3.12  | 2.97  | 2.42   | 16.58  | 47.58 | 36.68 | 43.66  | 54.41  | 39.32  | 6.25   | 11.05  | 7.65   | 146.51 | 98.70 |
| Ni | 1.23  | 1.62  | 1.35  | 0.95  | 1.44  | 1.76  | 1.09   | 1.19  | 1.06  | 0.68   | 7.22   | 13.70 | 11.36 | 27.62  | 35.67  | 26.58  | 9.87   | 12.89  | 12.10  | 64.51  | 42.80 |
| Cu | 0.85  | 5.25  | 1.92  | 1.24  | 1.19  | 27.49 | 0.79   | 0.82  | 1.06  | 0.66   | 256.08 | 10.59 | 2.68  | 12.25  | 12.27  | 10.47  | 4.93   | 4.32   | 2.90   | 15.29  | 11.02 |
| Zn | 36.67 | 48.46 | 49.78 | 30.32 | 46.09 | 51.30 | 44.17  | 43.92 | 45.97 | 17.57  | 49.51  | 67.83 | 62.60 | 56.72  | 54.09  | 55.85  | 43.88  | 49.90  | 51.87  | 58.98  | 43.99 |
| Ga | 21.07 | 21.79 | 20.95 | 17.44 | 19.88 | 20.33 | 18.79  | 19.56 | 19.75 | 13.37  | 22.32  | 22.74 | 21.91 | 19.42  | 19.08  | 19.02  | 19.99  | 20.75  | 20.34  | 19.43  | 14.61 |
| Rb | 47.19 | 68.60 | 49.54 | 33.09 | 97.03 | 71.95 | 97.19  | 91.40 | 93.99 | 89.42  | 282.7  | 37.59 | 61.11 | 69.01  | 72.96  | 64.94  | 28.73  | 33.72  | 45.13  | 94.09  | 77.81 |
| Sr | 885.3 | 615.1 | 771.4 | 720.9 | 301.4 | 607.9 | 359.0  | 398.7 | 537.8 | 213.4  | 61.7   | 485.6 | 686.6 | 504.5  | 475.4  | 469.0  | 694.9  | 684.3  | 637.2  | 763.5  | 603.4 |
| Y  | 15.05 | 12.44 | 11.57 | 8.62  | 16.07 | 12.50 | 16.75  | 14.81 | 18.55 | 8.25   | 21.86  | 18.19 | 17.36 | 13.29  | 13.55  | 11.32  | 7.00   | 8.39   | 8.28   | 14.31  | 10.67 |
| Zr | 736.4 | 299.7 | 380.2 | 317.4 | 641.3 | 396.5 | 599.5  | 661.5 | 410.3 | 241.6  | 152.7  | 402.2 | 353.6 | 166.09 | 142.53 | 152.50 | 113.28 | 142.59 | 126.51 | 42.27  | 57.69 |
| Nb | 3.61  | 5.25  | 5.77  | 3.38  | 9.43  | 7.10  | 9.45   | 7.17  | 6.00  | 4.63   | 39.24  | 6.72  | 4.95  | 10.36  | 9.59   | 9.98   | 4.29   | 6.32   | 6.44   | 9.64   | 6.88  |
| Cs | 3.45  | 3.51  | 2.65  | 1.80  | 5.20  | 4.12  | 3.54   | 5.44  | 2.38  | 2.85   | 15.75  | 4.37  | 3.13  | 5.86   | 5.07   | 4.36   | 1.54   | 2.80   | 3.20   | 4.96   | 3.58  |
| Ba | 479.5 | 867.6 | 907.0 | 718.5 | 779.4 | 943.4 | 1334.6 | 960.1 | 963.4 | 1148.3 | 255.0  | 703.2 | 514.8 | 873.1  | 884.2  | 879.7  | 845.5  | 872.8  | 886.8  | 1059.9 | 926.2 |
| La | 13.15 | 18.37 | 23.95 | 12.33 | 23.34 | 23.39 | 29.72  | 22.20 | 20.76 | 17.29  | 22.46  | 22.52 | 48.03 | 38.44  | 35.45  | 40.80  | 14.23  | 20.50  | 20.61  | 51.31  | 33.33 |
| Ce | 23.09 | 34.04 | 44.53 | 21.40 | 39.13 | 42.60 | 53.37  | 37.69 | 37.87 | 31.39  | 45.63  | 42.78 | 95.10 | 78.04  | 74.08  | 83.95  | 26.84  | 41.63  | 39.47  | 97.00  | 61.95 |
| Pr | 2.54  | 3.90  | 4.89  | 2.24  | 4.21  | 4.78  | 5.43   | 4.06  | 4.27  | 3.32   | 5.33   | 5.14  | 9.98  | 8.14   | 7.62   | 8.60   | 3.12   | 4.57   | 4.43   | 10.37  | 6.92  |
| Nd | 8.88  | 14.45 | 17.66 | 7.84  | 14.11 | 17.26 | 18.88  | 14.38 | 15.16 | 11.69  | 19.18  | 19.89 | 35.29 | 29.35  | 27.64  | 29.87  | 11.75  | 16.68  | 16.37  | 37.20  | 25.17 |
| Sm | 1.46  | 2.51  | 2.92  | 1.14  | 2.25  | 3.10  | 3.16   | 2.37  | 2.78  | 1.97   | 4.10   | 3.84  | 5.19  | 4.87   | 4.74   | 4.77   | 2.14   | 2.93   | 2.88   | 6.01   | 4.23  |
| Eu | 0.64  | 0.62  | 0.71  | 0.57  | 0.52  | 0.80  | 0.69   | 0.65  | 0.58  | 0.50   | 0.44   | 1.11  | 1.22  | 1.30   | 1.34   | 1.21   | 0.63   | 0.85   | 0.88   | 1.59   | 1.17  |
| Gd | 1.23  | 2.29  | 2.58  | 1.15  | 1.90  | 2.90  | 2.89   | 1.99  | 2.75  | 1.56   | 3.79   | 3.42  | 4.39  | 4.76   | 4.67   | 4.48   | 2.15   | 2.90   | 2.80   | 5.61   | 3.92  |
| Tb | 0.16  | 0.32  | 0.31  | 0.12  | 0.24  | 0.37  | 0.36   | 0.25  | 0.39  | 0.19   | 0.58   | 0.48  | 0.51  | 0.58   | 0.61   | 0.55   | 0.29   | 0.37   | 0.36   | 0.67   | 0.48  |
| Dy | 0.85  | 1.56  | 1.50  | 0.58  | 1.07  | 1.69  | 1.88   | 1.20  | 2.19  | 0.84   | 3.37   | 2.32  | 2.37  | 2.92   | 2.93   | 2.62   | 1.46   | 1.80   | 1.85   | 3.31   | 2.35  |
| Ho | 0.18  | 0.29  | 0.26  | 0.12  | 0.20  | 0.30  | 0.32   | 0.20  | 0.41  | 0.17   | 0.70   | 0.47  | 0.37  | 0.49   | 0.53   | 0.43   | 0.26   | 0.33   | 0.32   | 0.55   | 0.41  |
| Er | 0.53  | 0.80  | 0.75  | 0.36  | 0.52  | 0.72  | 0.89   | 0.61  | 1.26  | 0.44   | 2.07   | 1.30  | 0.98  | 1.47   | 1.51   | 1.27   | 0.80   | 0.93   | 0.92   | 1.59   | 1.20  |

|                      |       |       |       |       |       |       |       |       |       |       |       |       |       |       |       |       |       |       |       |       |       |
|----------------------|-------|-------|-------|-------|-------|-------|-------|-------|-------|-------|-------|-------|-------|-------|-------|-------|-------|-------|-------|-------|-------|
| Tm                   | 0.08  | 0.13  | 0.11  | 0.05  | 0.07  | 0.12  | 0.12  | 0.08  | 0.18  | 0.08  | 0.34  | 0.18  | 0.12  | 0.20  | 0.22  | 0.16  | 0.11  | 0.12  | 0.13  | 0.21  | 0.16  |
| Yb                   | 0.59  | 0.78  | 0.72  | 0.37  | 0.46  | 0.65  | 0.83  | 0.58  | 1.34  | 0.48  | 2.46  | 1.15  | 0.72  | 1.30  | 1.36  | 1.09  | 0.73  | 0.88  | 0.82  | 1.34  | 1.06  |
| Lu                   | 0.10  | 0.11  | 0.11  | 0.06  | 0.07  | 0.10  | 0.14  | 0.09  | 0.19  | 0.08  | 0.39  | 0.18  | 0.10  | 0.20  | 0.23  | 0.16  | 0.12  | 0.13  | 0.13  | 0.20  | 0.15  |
| Hf                   | 17.05 | 7.16  | 9.12  | 7.05  | 14.38 | 9.26  | 13.95 | 15.23 | 9.53  | 5.94  | 5.09  | 9.16  | 8.12  | 6.75  | 6.94  | 6.33  | 4.45  | 5.61  | 5.13  | 3.47  | 3.23  |
| Ta                   | 0.28  | 0.49  | 0.36  | 0.20  | 0.86  | 0.55  | 0.58  | 0.62  | 0.38  | 0.41  | 3.81  | 0.40  | 0.22  | 1.35  | 1.48  | 1.01  | 0.72  | 0.70  | 0.83  | 1.21  | 0.86  |
| Pb                   | 12.54 | 14.23 | 14.35 | 10.59 | 27.54 | 15.69 | 24.61 | 13.27 | 19.47 | 22.03 | 51.54 | 8.86  | 10.97 | 22.64 | 23.49 | 23.22 | 11.40 | 21.83 | 20.50 | 22.04 | 17.14 |
| Th                   | 3.37  | 4.55  | 7.37  | 3.15  | 9.59  | 5.29  | 13.73 | 7.84  | 6.67  | 7.10  | 28.63 | 5.23  | 9.82  | 14.49 | 15.16 | 15.78 | 3.97  | 8.23  | 7.36  | 15.63 | 10.32 |
| U                    | 0.82  | 1.15  | 1.60  | 0.71  | 1.90  | 3.02  | 1.94  | 0.98  | 1.86  | 1.57  | 8.30  | 0.86  | 0.95  | 3.92  | 4.31  | 3.12  | 0.99  | 2.08  | 1.95  | 2.66  | 1.98  |
| (La/Yb) <sub>N</sub> | 15.96 | 16.86 | 23.78 | 23.98 | 36.36 | 25.90 | 25.62 | 27.64 | 11.15 | 25.90 | 6.55  | 14.04 | 47.89 | 21.16 | 18.76 | 26.86 | 14.04 | 16.76 | 17.95 | 27.38 | 22.62 |
| (La/Sm) <sub>N</sub> | 5.83  | 4.73  | 5.29  | 6.95  | 6.69  | 4.86  | 6.07  | 6.06  | 4.81  | 5.67  | 3.53  | 3.79  | 5.97  | 5.09  | 4.82  | 5.53  | 4.30  | 4.52  | 4.62  | 5.51  | 5.09  |
| (Gd/Yb) <sub>N</sub> | 1.72  | 2.42  | 2.95  | 2.57  | 3.41  | 3.71  | 2.88  | 2.86  | 1.71  | 2.69  | 1.27  | 2.46  | 5.05  | 3.02  | 2.85  | 3.40  | 2.45  | 2.73  | 2.81  | 3.45  | 3.07  |
| δ <sub>Eu</sub>      | 1.42  | 0.78  | 0.78  | 1.50  | 0.74  | 0.81  | 0.68  | 0.90  | 0.63  | 0.84  | 0.34  | 0.92  | 0.76  | 0.81  | 0.86  | 0.79  | 0.89  | 0.89  | 0.94  | 0.82  | 0.87  |
| δ <sub>Ce</sub>      | 0.92  | 0.94  | 0.95  | 0.93  | 0.90  | 0.93  | 0.96  | 0.90  | 0.93  | 0.95  | 0.99  | 0.94  | 1.01  | 1.03  | 1.05  | 1.04  | 0.94  | 1.01  | 0.97  | 0.97  | 0.95  |
| Nb/Ta                | 0.75  | 0.61  | 0.93  | 0.97  | 0.63  | 0.74  | 0.94  | 0.67  | 0.90  | 0.64  | 0.59  | 0.98  | 1.27  | 0.44  | 0.37  | 0.57  | 0.34  | 0.52  | 0.45  | 0.46  | 0.46  |

MG: Monzogranite; GR: granite; QD: quartz diorite

**Table S2.** Zircon U-Pb isotopic ages of the Guangtoushan and Miba plutons obtained by the LA-ICP-MS technique.

| Analytical                 | <sup>207</sup> Pb | Th    | U     | Th/U | <sup>207</sup> Pb/ <sup>206</sup> Pb | ±1σ    | <sup>207</sup> Pb/ <sup>235</sup> U | ±1σ    | <sup>206</sup> Pb/ <sup>238</sup> U | ±1σ    | <sup>207</sup> Pb/ <sup>206</sup> Pb | ±1σ   | <sup>207</sup> Pb/ <sup>235</sup> U | ±1σ  | <sup>206</sup> Pb/ <sup>238</sup> U | ±1σ  | Concordant |
|----------------------------|-------------------|-------|-------|------|--------------------------------------|--------|-------------------------------------|--------|-------------------------------------|--------|--------------------------------------|-------|-------------------------------------|------|-------------------------------------|------|------------|
| Spot No.                   | (ppm)             | (ppm) | (ppm) |      | ratio                                |        | ratio                               |        | ratio                               |        | (Ma)                                 |       | (Ma)                                |      | (Ma)                                |      |            |
| <b>Guangtoushan pluton</b> |                   |       |       |      |                                      |        |                                     |        |                                     |        |                                      |       |                                     |      |                                     |      |            |
| <b>GTS1502</b>             |                   |       |       |      |                                      |        |                                     |        |                                     |        |                                      |       |                                     |      |                                     |      |            |
| GTS02-1                    | 112               | 248   | 5437  | 0.05 | 0.0498                               | 0.0018 | 0.2375                              | 0.0081 | 0.0342                              | 0.0003 | 187.1                                | 117.6 | 216.4                               | 6.7  | 216.6                               | 2.0  | 99%        |
| GTS02-2                    | 149               | 474   | 649   | 0.73 | 0.0662                               | 0.0030 | 1.0724                              | 0.0490 | 0.1167                              | 0.0022 | 813.0                                | 95.5  | 739.9                               | 24.0 | 711.8                               | 13.0 | 96%        |
| GTS02-4                    | 54                | 313   | 1416  | 0.22 | 0.0559                               | 0.0029 | 0.2749                              | 0.0126 | 0.0357                              | 0.0005 | 450.0                                | 114.8 | 246.6                               | 10.1 | 226.3                               | 2.9  | 91%        |
| GTS02-5                    | 80                | 731   | 2407  | 0.30 | 0.0496                               | 0.0022 | 0.2267                              | 0.0098 | 0.0325                              | 0.0004 | 176.0                                | 100.9 | 207.4                               | 8.2  | 205.9                               | 2.5  | 99%        |
| GTS02-6                    | 80                | 378   | 3593  | 0.11 | 0.0504                               | 0.0027 | 0.2330                              | 0.0118 | 0.0329                              | 0.0004 | 213.0                                | 122.2 | 212.6                               | 9.7  | 208.5                               | 2.8  | 98%        |

|          |     |      |      |      |        |        |        |        |        |        |       |       |       |      |       |      |     |
|----------|-----|------|------|------|--------|--------|--------|--------|--------|--------|-------|-------|-------|------|-------|------|-----|
| GTS02-7  | 46  | 417  | 1184 | 0.35 | 0.0537 | 0.0029 | 0.2339 | 0.0112 | 0.0314 | 0.0004 | 366.7 | 120.4 | 213.4 | 9.2  | 199.1 | 2.7  | 93% |
| GTS02-8  | 85  | 1118 | 3316 | 0.34 | 0.0524 | 0.0024 | 0.1849 | 0.0086 | 0.0250 | 0.0005 | 301.9 | 105.5 | 172.3 | 7.4  | 159.2 | 3.3  | 92% |
| GTS02-9  | 28  | 147  | 1060 | 0.14 | 0.0533 | 0.0031 | 0.2355 | 0.0119 | 0.0319 | 0.0004 | 338.9 | 129.6 | 214.7 | 9.8  | 202.4 | 2.7  | 94% |
| GTS02-10 | 47  | 448  | 1093 | 0.41 | 0.0513 | 0.0028 | 0.2292 | 0.0107 | 0.0330 | 0.0004 | 257.5 | 132.4 | 209.6 | 8.9  | 209.5 | 2.8  | 99% |
| GTS02-11 | 107 | 945  | 3185 | 0.30 | 0.0490 | 0.0019 | 0.2231 | 0.0080 | 0.0323 | 0.0003 | 150.1 | 90.7  | 204.5 | 6.7  | 205.0 | 2.1  | 99% |
| GTS02-12 | 76  | 361  | 2629 | 0.14 | 0.0519 | 0.0022 | 0.2442 | 0.0096 | 0.0337 | 0.0004 | 279.7 | 93.5  | 221.9 | 7.8  | 213.5 | 2.4  | 96% |
| GTS02-13 | 118 | 728  | 5299 | 0.14 | 0.0479 | 0.0019 | 0.2041 | 0.0076 | 0.0300 | 0.0003 | 100.1 | 83.3  | 188.6 | 6.4  | 190.4 | 2.1  | 99% |
| GTS02-14 | 90  | 416  | 889  | 0.47 | 0.0608 | 0.0029 | 0.7100 | 0.0395 | 0.0824 | 0.0024 | 631.5 | 101.8 | 544.7 | 23.4 | 510.6 | 14.2 | 93% |
| GTS02-15 | 87  | 381  | 834  | 0.46 | 0.0557 | 0.0032 | 0.4882 | 0.0259 | 0.0620 | 0.0010 | 442.6 | 129.6 | 403.7 | 17.6 | 388.1 | 6.1  | 96% |
| GTS02-16 | 43  | 309  | 1331 | 0.23 | 0.0499 | 0.0028 | 0.2393 | 0.0124 | 0.0340 | 0.0005 | 190.8 | 129.6 | 217.9 | 10.2 | 215.8 | 3.4  | 99% |
| GTS02-17 | 25  | 159  | 778  | 0.20 | 0.0513 | 0.0034 | 0.2270 | 0.0128 | 0.0325 | 0.0006 | 253.8 | 150.0 | 207.7 | 10.6 | 206.0 | 3.5  | 99% |
| GTS02-18 | 101 | 670  | 3502 | 0.19 | 0.0496 | 0.0020 | 0.2488 | 0.0094 | 0.0353 | 0.0004 | 176.0 | 92.6  | 225.6 | 7.7  | 223.6 | 2.7  | 99% |
| GTS02-19 | 139 | 1171 | 4105 | 0.29 | 0.0495 | 0.0019 | 0.2363 | 0.0088 | 0.0337 | 0.0004 | 172.3 | 88.9  | 215.4 | 7.2  | 213.5 | 2.5  | 99% |
| GTS02-20 | 74  | 663  | 1632 | 0.41 | 0.0553 | 0.0038 | 0.2700 | 0.0169 | 0.0354 | 0.0005 | 433.4 | 151.8 | 242.7 | 13.5 | 224.0 | 3.4  | 92% |
| GTS02-21 | 73  | 784  | 1689 | 0.46 | 0.0514 | 0.0024 | 0.2303 | 0.0102 | 0.0319 | 0.0004 | 261.2 | 107.4 | 210.4 | 8.4  | 202.4 | 2.7  | 96% |
| GTS02-22 | 29  | 385  | 357  | 1.08 | 0.0572 | 0.0053 | 0.2243 | 0.0159 | 0.0296 | 0.0006 | 501.9 | 208.3 | 205.5 | 13.2 | 188.1 | 4.0  | 91% |
| GTS02-23 | 44  | 407  | 1281 | 0.32 | 0.0499 | 0.0025 | 0.2215 | 0.0104 | 0.0323 | 0.0004 | 190.8 | 113.9 | 203.2 | 8.6  | 205.1 | 2.6  | 99% |
| GTS02-24 | 39  | 341  | 1121 | 0.30 | 0.0503 | 0.0029 | 0.2151 | 0.0108 | 0.0314 | 0.0004 | 205.6 | 133.3 | 197.8 | 9.1  | 199.5 | 2.8  | 99% |
| GTS02-25 | 40  | 333  | 1120 | 0.30 | 0.0509 | 0.0028 | 0.2226 | 0.0112 | 0.0322 | 0.0004 | 235.3 | 130.5 | 204.1 | 9.3  | 204.1 | 2.8  | 99% |
| GTS02-26 | 24  | 243  | 626  | 0.39 | 0.0518 | 0.0044 | 0.2077 | 0.0155 | 0.0300 | 0.0005 | 276.0 | 189.8 | 191.6 | 13.0 | 190.4 | 3.3  | 99% |
| GTS02-27 | 35  | 195  | 1383 | 0.14 | 0.0530 | 0.0024 | 0.2333 | 0.0101 | 0.0317 | 0.0004 | 327.8 | 103.7 | 213.0 | 8.3  | 201.0 | 2.4  | 94% |
| GTS02-28 | 39  | 179  | 1624 | 0.11 | 0.0522 | 0.0024 | 0.2430 | 0.0110 | 0.0333 | 0.0005 | 300.1 | 105.5 | 220.9 | 9.0  | 210.9 | 3.0  | 95% |
| GTS02-29 | 41  | 198  | 1679 | 0.12 | 0.0508 | 0.0026 | 0.2260 | 0.0113 | 0.0317 | 0.0004 | 231.6 | 118.5 | 206.9 | 9.4  | 200.9 | 2.8  | 97% |
| GTS02-30 | 74  | 831  | 1690 | 0.49 | 0.0507 | 0.0023 | 0.2221 | 0.0092 | 0.0318 | 0.0004 | 233.4 | 105.5 | 203.6 | 7.6  | 201.9 | 2.3  | 99% |
| GTS02-31 | 14  | 129  | 358  | 0.36 | 0.0539 | 0.0047 | 0.2183 | 0.0161 | 0.0319 | 0.0007 | 368.6 | 193.5 | 200.5 | 13.4 | 202.2 | 4.1  | 99% |
| GTS02-32 | 69  | 533  | 2539 | 0.21 | 0.0515 | 0.0019 | 0.2325 | 0.0083 | 0.0322 | 0.0003 | 264.9 | 85.2  | 212.3 | 6.9  | 204.5 | 2.0  | 96% |

**GTS1503**

|          |     |      |      |      |        |        |        |        |        |        |       |       |       |      |       |     |     |
|----------|-----|------|------|------|--------|--------|--------|--------|--------|--------|-------|-------|-------|------|-------|-----|-----|
| GTS03-1  | 170 | 1534 | 3145 | 0.49 | 0.0495 | 0.0014 | 0.2224 | 0.0064 | 0.0323 | 0.0003 | 172.3 | 66.7  | 203.9 | 5.3  | 205.0 | 1.7 | 99% |
| GTS03-3  | 50  | 484  | 736  | 0.66 | 0.0538 | 0.0027 | 0.2343 | 0.0107 | 0.0321 | 0.0004 | 361.2 | 108.3 | 213.7 | 8.8  | 203.7 | 2.4 | 95% |
| GTS03-4  | 70  | 591  | 1742 | 0.34 | 0.0520 | 0.0020 | 0.2480 | 0.0099 | 0.0342 | 0.0005 | 283.4 | 88.9  | 225.0 | 8.1  | 217.0 | 2.9 | 96% |
| GTS03-5  | 47  | 355  | 1096 | 0.32 | 0.0500 | 0.0021 | 0.2201 | 0.0087 | 0.0320 | 0.0003 | 194.5 | 102.8 | 202.0 | 7.2  | 203.3 | 2.2 | 99% |
| GTS03-6  | 28  | 218  | 521  | 0.42 | 0.0545 | 0.0035 | 0.2282 | 0.0126 | 0.0313 | 0.0005 | 390.8 | 142.6 | 208.7 | 10.4 | 198.6 | 2.9 | 95% |
| GTS03-7  | 28  | 178  | 463  | 0.39 | 0.0520 | 0.0033 | 0.2225 | 0.0129 | 0.0318 | 0.0004 | 287.1 | 113.9 | 204.0 | 10.7 | 202.0 | 2.8 | 99% |
| GTS03-8  | 53  | 226  | 1647 | 0.14 | 0.0510 | 0.0019 | 0.2444 | 0.0089 | 0.0348 | 0.0004 | 242.7 | 85.2  | 222.0 | 7.3  | 220.4 | 2.7 | 99% |
| GTS03-9  | 47  | 480  | 912  | 0.53 | 0.0497 | 0.0022 | 0.2154 | 0.0086 | 0.0320 | 0.0004 | 189.0 | 103.7 | 198.1 | 7.2  | 203.1 | 2.3 | 97% |
| GTS03-10 | 49  | 228  | 1153 | 0.20 | 0.0506 | 0.0026 | 0.2374 | 0.0112 | 0.0348 | 0.0005 | 220.4 | 125.0 | 216.3 | 9.2  | 220.4 | 2.9 | 98% |
| GTS03-11 | 82  | 759  | 2210 | 0.34 | 0.0498 | 0.0017 | 0.2270 | 0.0075 | 0.0330 | 0.0003 | 183.4 | 77.8  | 207.7 | 6.2  | 209.3 | 2.0 | 99% |
| GTS03-12 | 64  | 361  | 2323 | 0.16 | 0.0474 | 0.0020 | 0.2204 | 0.0089 | 0.0338 | 0.0004 | 77.9  | 90.7  | 202.3 | 7.4  | 214.5 | 2.5 | 94% |
| GTS03-13 | 55  | 232  | 1157 | 0.20 | 0.0511 | 0.0021 | 0.3833 | 0.0188 | 0.0544 | 0.0013 | 255.6 | 99.1  | 329.5 | 13.8 | 341.5 | 8.2 | 96% |
| GTS03-14 | 39  | 347  | 798  | 0.44 | 0.0489 | 0.0024 | 0.2124 | 0.0095 | 0.0322 | 0.0004 | 142.7 | 112.0 | 195.6 | 8.0  | 204.5 | 2.8 | 95% |
| GTS03-15 | 96  | 474  | 3047 | 0.16 | 0.0525 | 0.0015 | 0.2341 | 0.0064 | 0.0323 | 0.0003 | 309.3 | 64.8  | 213.6 | 5.3  | 205.0 | 1.8 | 95% |
| GTS03-17 | 43  | 217  | 1665 | 0.13 | 0.0522 | 0.0020 | 0.2383 | 0.0085 | 0.0333 | 0.0004 | 294.5 | 88.9  | 217.0 | 6.9  | 210.9 | 2.3 | 97% |
| GTS03-18 | 48  | 253  | 1171 | 0.22 | 0.0511 | 0.0020 | 0.2223 | 0.0083 | 0.0313 | 0.0003 | 255.6 | 88.9  | 203.8 | 6.9  | 198.8 | 2.0 | 97% |
| GTS03-19 | 33  | 210  | 748  | 0.28 | 0.0525 | 0.0026 | 0.2228 | 0.0101 | 0.0314 | 0.0004 | 305.6 | 114.8 | 204.2 | 8.3  | 199.1 | 2.5 | 97% |
| GTS03-21 | 97  | 544  | 3242 | 0.17 | 0.0509 | 0.0018 | 0.2251 | 0.0077 | 0.0315 | 0.0003 | 239.0 | 81.5  | 206.1 | 6.4  | 200.1 | 2.0 | 97% |
| GTS03-22 | 45  | 214  | 1470 | 0.15 | 0.0548 | 0.0025 | 0.2448 | 0.0104 | 0.0325 | 0.0003 | 405.6 | 103.7 | 222.3 | 8.5  | 205.9 | 2.1 | 92% |
| GTS03-24 | 38  | 190  | 1330 | 0.14 | 0.0510 | 0.0022 | 0.2283 | 0.0094 | 0.0326 | 0.0004 | 242.7 | 100.0 | 208.8 | 7.8  | 206.9 | 2.4 | 99% |
| GTS03-25 | 34  | 192  | 1135 | 0.17 | 0.0520 | 0.0021 | 0.2258 | 0.0090 | 0.0314 | 0.0003 | 287.1 | 99.1  | 206.8 | 7.5  | 199.5 | 2.2 | 96% |
| GTS03-26 | 37  | 228  | 1153 | 0.20 | 0.0513 | 0.0023 | 0.2262 | 0.0096 | 0.0321 | 0.0004 | 253.8 | 101.8 | 207.1 | 8.0  | 203.9 | 2.2 | 98% |
| GTS03-27 | 53  | 388  | 1337 | 0.29 | 0.0546 | 0.0024 | 0.2352 | 0.0097 | 0.0314 | 0.0004 | 394.5 | 100.0 | 214.5 | 8.0  | 199.4 | 2.3 | 92% |
| GTS03-28 | 79  | 512  | 2442 | 0.21 | 0.0522 | 0.0019 | 0.2275 | 0.0080 | 0.0313 | 0.0003 | 294.5 | 81.5  | 208.1 | 6.6  | 198.8 | 2.2 | 95% |
| GTS03-31 | 32  | 201  | 1123 | 0.18 | 0.0528 | 0.0019 | 0.2308 | 0.0080 | 0.0314 | 0.0003 | 316.7 | 83.3  | 210.8 | 6.6  | 199.5 | 2.0 | 94% |

|                |     |     |      |      |        |        |        |        |        |        |        |       |        |      |        |      |     |
|----------------|-----|-----|------|------|--------|--------|--------|--------|--------|--------|--------|-------|--------|------|--------|------|-----|
| GTS03-32       | 57  | 244 | 2155 | 0.11 | 0.0526 | 0.0017 | 0.2327 | 0.0074 | 0.0319 | 0.0003 | 322.3  | 72.2  | 212.4  | 6.1  | 202.2  | 1.8  | 95% |
| <b>GTS1506</b> |     |     |      |      |        |        |        |        |        |        |        |       |        |      |        |      |     |
| GTS06-1        | 109 | 836 | 2679 | 0.31 | 0.0509 | 0.0022 | 0.2389 | 0.0102 | 0.0340 | 0.0003 | 235.3  | 106.5 | 217.5  | 8.4  | 215.8  | 2.1  | 99% |
| GTS06-2        | 61  | 357 | 1455 | 0.25 | 0.0542 | 0.0026 | 0.2944 | 0.0130 | 0.0396 | 0.0005 | 388.9  | 73.1  | 262.0  | 10.2 | 250.2  | 3.0  | 95% |
| GTS06-3        | 32  | 255 | 709  | 0.36 | 0.0538 | 0.0049 | 0.2403 | 0.0190 | 0.0344 | 0.0007 | 361.2  | 205.5 | 218.7  | 15.6 | 217.9  | 4.2  | 99% |
| GTS06-4        | 34  | 282 | 811  | 0.35 | 0.0503 | 0.0035 | 0.2384 | 0.0151 | 0.0343 | 0.0006 | 209.3  | 162.9 | 217.1  | 12.4 | 217.7  | 3.6  | 99% |
| GTS06-6        | 148 | 141 | 1731 | 0.08 | 0.0692 | 0.0018 | 1.4215 | 0.0428 | 0.1447 | 0.0023 | 905.6  | 56.5  | 898.0  | 17.9 | 871.1  | 13.1 | 96% |
| GTS06-7        | 49  | 387 | 1186 | 0.33 | 0.0499 | 0.0033 | 0.2554 | 0.0159 | 0.0366 | 0.0005 | 190.8  | 158.3 | 231.0  | 12.9 | 231.6  | 3.3  | 99% |
| GTS06-10       | 36  | 200 | 1229 | 0.16 | 0.0553 | 0.0025 | 0.2600 | 0.0108 | 0.0341 | 0.0004 | 427.8  | 101.8 | 234.6  | 8.7  | 216.4  | 2.7  | 91% |
| GTS06-12       | 450 | 715 | 932  | 0.77 | 0.0951 | 0.0032 | 3.2162 | 0.1042 | 0.2406 | 0.0027 | 1529.3 | 63.4  | 1461.1 | 25.1 | 1389.8 | 14.1 | 95% |
| GTS06-14       | 78  | 307 | 3133 | 0.10 | 0.0542 | 0.0022 | 0.2550 | 0.0099 | 0.0339 | 0.0004 | 388.9  | 95.4  | 230.6  | 8.0  | 215.1  | 2.6  | 93% |
| GTS06-16       | 172 | 642 | 2307 | 0.28 | 0.0554 | 0.0020 | 0.4492 | 0.0154 | 0.0583 | 0.0007 | 427.8  | 79.6  | 376.7  | 10.8 | 365.1  | 4.3  | 96% |
| GTS06-20       | 29  | 208 | 880  | 0.24 | 0.0507 | 0.0028 | 0.2272 | 0.0116 | 0.0330 | 0.0005 | 227.8  | 125.9 | 207.9  | 9.6  | 209.5  | 3.1  | 99% |
| GTS06-21       | 571 | 792 | 1422 | 0.56 | 0.0943 | 0.0027 | 2.8059 | 0.0754 | 0.2126 | 0.0021 | 1514.5 | 53.7  | 1357.1 | 20.1 | 1242.5 | 11.2 | 91% |
| GTS06-22       | 75  | 765 | 1259 | 0.61 | 0.0582 | 0.0038 | 0.2518 | 0.0122 | 0.0330 | 0.0005 | 600.0  | 142.6 | 228.1  | 9.9  | 209.3  | 3.3  | 91% |
| GTS06-23       | 83  | 524 | 2187 | 0.24 | 0.0554 | 0.0023 | 0.2627 | 0.0101 | 0.0342 | 0.0004 | 427.8  | 95.4  | 236.9  | 8.1  | 216.6  | 2.2  | 91% |
| GTS06-29       | 49  | 395 | 948  | 0.42 | 0.0570 | 0.0032 | 0.2626 | 0.0131 | 0.0338 | 0.0005 | 494.5  | 124.1 | 236.8  | 10.5 | 214.4  | 3.1  | 90% |
| GTS06-32       | 60  | 519 | 1021 | 0.51 | 0.0564 | 0.0041 | 0.2804 | 0.0188 | 0.0368 | 0.0006 | 477.8  | 161.1 | 251.0  | 14.9 | 233.2  | 3.9  | 92% |
| <b>GTS1507</b> |     |     |      |      |        |        |        |        |        |        |        |       |        |      |        |      |     |
| GTS07-1        | 43  | 375 | 938  | 0.40 | 0.0531 | 0.0026 | 0.2343 | 0.0103 | 0.0324 | 0.0004 | 344.5  | 113.0 | 213.7  | 8.5  | 205.8  | 2.6  | 96% |
| GTS07-2        | 15  | 118 | 281  | 0.42 | 0.0587 | 0.0057 | 0.2420 | 0.0200 | 0.0324 | 0.0007 | 566.7  | 219.4 | 220.0  | 16.4 | 205.3  | 4.2  | 93% |
| GTS07-3        | 17  | 169 | 276  | 0.61 | 0.0510 | 0.0042 | 0.2215 | 0.0170 | 0.0336 | 0.0006 | 242.7  | 190.7 | 203.1  | 14.2 | 213.0  | 3.8  | 95% |
| GTS07-4        | 73  | 844 | 1330 | 0.63 | 0.0515 | 0.0023 | 0.2279 | 0.0097 | 0.0319 | 0.0004 | 261.2  | 97.2  | 208.5  | 8.0  | 202.3  | 2.3  | 96% |
| GTS07-5        | 194 | 536 | 725  | 0.74 | 0.0660 | 0.0020 | 1.2836 | 0.0373 | 0.1395 | 0.0014 | 807.1  | 67.6  | 838.5  | 16.6 | 841.8  | 7.8  | 99% |
| GTS07-6        | 19  | 195 | 361  | 0.54 | 0.0592 | 0.0071 | 0.2369 | 0.0149 | 0.0338 | 0.0006 | 576.0  | 258.3 | 215.9  | 12.3 | 214.1  | 3.6  | 99% |

|                |    |      |      |      |        |        |        |        |        |        |       |       |       |      |       |     |     |
|----------------|----|------|------|------|--------|--------|--------|--------|--------|--------|-------|-------|-------|------|-------|-----|-----|
| GTS07-7        | 13 | 111  | 265  | 0.42 | 0.0624 | 0.0057 | 0.2471 | 0.0164 | 0.0325 | 0.0007 | 687.1 | 196.3 | 224.2 | 13.4 | 206.3 | 4.3 | 91% |
| GTS07-8        | 41 | 431  | 689  | 0.63 | 0.0513 | 0.0028 | 0.2406 | 0.0122 | 0.0344 | 0.0005 | 253.8 | 125.9 | 218.9 | 10.0 | 217.9 | 3.0 | 99% |
| GTS07-9        | 31 | 357  | 570  | 0.63 | 0.0540 | 0.0034 | 0.2362 | 0.0130 | 0.0325 | 0.0005 | 368.6 | 144.4 | 215.3 | 10.7 | 205.9 | 3.0 | 95% |
| GTS07-10       | 25 | 194  | 795  | 0.24 | 0.0513 | 0.0033 | 0.2252 | 0.0125 | 0.0324 | 0.0004 | 257.5 | 146.3 | 206.2 | 10.4 | 205.7 | 2.8 | 99% |
| GTS07-11       | 43 | 359  | 1172 | 0.31 | 0.0514 | 0.0023 | 0.2345 | 0.0099 | 0.0331 | 0.0004 | 257.5 | 106.5 | 213.9 | 8.2  | 210.1 | 2.5 | 98% |
| GTS07-12       | 15 | 134  | 266  | 0.50 | 0.0610 | 0.0056 | 0.2417 | 0.0202 | 0.0325 | 0.0006 | 638.9 | 200.9 | 219.8 | 16.5 | 206.1 | 4.0 | 93% |
| GTS07-13       | 20 | 167  | 471  | 0.35 | 0.0572 | 0.0036 | 0.2579 | 0.0144 | 0.0338 | 0.0006 | 501.9 | 140.7 | 232.9 | 11.6 | 214.1 | 3.5 | 91% |
| GTS07-15       | 27 | 279  | 550  | 0.51 | 0.0518 | 0.0032 | 0.2241 | 0.0120 | 0.0326 | 0.0005 | 276.0 | 142.6 | 205.3 | 9.9  | 206.8 | 3.1 | 99% |
| GTS07-17       | 46 | 404  | 1201 | 0.34 | 0.0488 | 0.0022 | 0.2208 | 0.0094 | 0.0325 | 0.0004 | 200.1 | 105.5 | 202.5 | 7.8  | 206.4 | 2.5 | 98% |
| GTS07-18       | 15 | 142  | 305  | 0.47 | 0.0581 | 0.0049 | 0.2415 | 0.0178 | 0.0337 | 0.0006 | 600.0 | 182.4 | 219.6 | 14.6 | 213.9 | 3.8 | 97% |
| GTS07-19       | 45 | 235  | 1704 | 0.14 | 0.0516 | 0.0019 | 0.2397 | 0.0083 | 0.0334 | 0.0003 | 264.9 | 78.7  | 218.2 | 6.8  | 211.9 | 2.1 | 97% |
| GTS07-20       | 20 | 188  | 424  | 0.44 | 0.0514 | 0.0037 | 0.2261 | 0.0145 | 0.0329 | 0.0005 | 257.5 | 166.6 | 207.0 | 12.0 | 208.9 | 3.2 | 99% |
| GTS07-23       | 32 | 330  | 500  | 0.66 | 0.0528 | 0.0033 | 0.2433 | 0.0142 | 0.0338 | 0.0005 | 320.4 | 140.7 | 221.2 | 11.6 | 214.3 | 3.1 | 96% |
| GTS07-24       | 31 | 221  | 865  | 0.26 | 0.0517 | 0.0029 | 0.2312 | 0.0114 | 0.0331 | 0.0005 | 333.4 | 97.2  | 211.2 | 9.4  | 209.9 | 2.8 | 99% |
| <b>GTS1512</b> |    |      |      |      |        |        |        |        |        |        |       |       |       |      |       |     |     |
| GTS12-1        | 76 | 705  | 2109 | 0.33 | 0.0532 | 0.0018 | 0.2443 | 0.0080 | 0.0332 | 0.0003 | 344.5 | 74.1  | 221.9 | 6.5  | 210.4 | 1.9 | 94% |
| GTS12-3        | 54 | 475  | 1310 | 0.36 | 0.0534 | 0.0023 | 0.2454 | 0.0104 | 0.0329 | 0.0004 | 342.7 | 91.7  | 222.8 | 8.5  | 208.6 | 2.3 | 93% |
| GTS12-4        | 69 | 643  | 1810 | 0.36 | 0.0472 | 0.0019 | 0.2206 | 0.0083 | 0.0337 | 0.0004 | 57.5  | 92.6  | 202.4 | 6.9  | 213.9 | 2.3 | 94% |
| GTS12-5        | 10 | 50   | 381  | 0.13 | 0.0554 | 0.0059 | 0.2370 | 0.0225 | 0.0333 | 0.0008 | 427.8 | 238.9 | 216.0 | 18.5 | 210.9 | 5.0 | 97% |
| GTS12-6        | 56 | 479  | 1537 | 0.31 | 0.0495 | 0.0020 | 0.2286 | 0.0087 | 0.0333 | 0.0004 | 168.6 | 94.4  | 209.1 | 7.2  | 211.1 | 2.3 | 99% |
| GTS12-7        | 88 | 1054 | 1223 | 0.86 | 0.0558 | 0.0027 | 0.2591 | 0.0116 | 0.0340 | 0.0004 | 442.6 | 109.2 | 233.9 | 9.4  | 215.7 | 2.7 | 91% |
| GTS12-8        | 43 | 265  | 1314 | 0.20 | 0.0520 | 0.0022 | 0.2541 | 0.0104 | 0.0358 | 0.0004 | 283.4 | 102.8 | 229.9 | 8.4  | 226.6 | 2.7 | 98% |
| GTS12-9        | 22 | 122  | 692  | 0.18 | 0.0561 | 0.0029 | 0.2731 | 0.0132 | 0.0362 | 0.0005 | 453.8 | 110.2 | 245.2 | 10.6 | 229.3 | 3.3 | 93% |
| GTS12-10       | 36 | 204  | 1085 | 0.19 | 0.0564 | 0.0025 | 0.2566 | 0.0104 | 0.0333 | 0.0004 | 477.8 | 96.3  | 231.9 | 8.4  | 211.4 | 2.4 | 90% |
| GTS12-12       | 52 | 378  | 1449 | 0.26 | 0.0528 | 0.0022 | 0.2424 | 0.0094 | 0.0334 | 0.0004 | 320.4 | 94.4  | 220.4 | 7.7  | 212.0 | 2.5 | 96% |
| GTS12-13       | 37 | 250  | 1233 | 0.20 | 0.0516 | 0.0021 | 0.2336 | 0.0091 | 0.0331 | 0.0004 | 333.4 | 94.4  | 213.2 | 7.5  | 209.8 | 2.5 | 98% |

|                    |     |      |      |      |        |        |        |        |        |        |        |       |       |      |       |     |     |
|--------------------|-----|------|------|------|--------|--------|--------|--------|--------|--------|--------|-------|-------|------|-------|-----|-----|
| GTS12-14           | 42  | 341  | 1271 | 0.27 | 0.0502 | 0.0023 | 0.2318 | 0.0100 | 0.0333 | 0.0004 | 205.6  | 103.7 | 211.6 | 8.3  | 210.9 | 2.5 | 99% |
| GTS12-15           | 230 | 552  | 832  | 0.66 | 0.0714 | 0.0020 | 1.4929 | 0.0429 | 0.1502 | 0.0017 | 968.5  | 58.2  | 927.5 | 17.5 | 902.2 | 9.6 | 97% |
| GTS12-17           | 421 | 1432 | 689  | 2.08 | 0.0725 | 0.0029 | 1.3847 | 0.0529 | 0.1380 | 0.0016 | 1011.1 | 79.6  | 882.4 | 22.5 | 833.3 | 8.9 | 94% |
| GTS12-18           | 80  | 770  | 2010 | 0.38 | 0.0530 | 0.0021 | 0.2368 | 0.0096 | 0.0320 | 0.0004 | 327.8  | 92.6  | 215.8 | 7.9  | 203.0 | 2.3 | 93% |
| GTS12-19           | 33  | 191  | 963  | 0.20 | 0.0533 | 0.0028 | 0.2688 | 0.0131 | 0.0364 | 0.0005 | 342.7  | 118.5 | 241.7 | 10.5 | 230.7 | 3.1 | 95% |
| GTS12-20           | 60  | 483  | 1662 | 0.29 | 0.0500 | 0.0019 | 0.2337 | 0.0083 | 0.0336 | 0.0004 | 194.5  | 87.0  | 213.3 | 6.8  | 213.2 | 2.2 | 99% |
| GTS12-21           | 245 | 797  | 888  | 0.90 | 0.0646 | 0.0020 | 1.1175 | 0.0324 | 0.1239 | 0.0012 | 761.1  | 69.4  | 761.8 | 15.6 | 753.1 | 6.8 | 98% |
| GTS12-22           | 30  | 198  | 984  | 0.20 | 0.0500 | 0.0022 | 0.2366 | 0.0101 | 0.0339 | 0.0004 | 198.2  | 97.2  | 215.6 | 8.3  | 214.9 | 2.4 | 99% |
| GTS12-23           | 77  | 258  | 343  | 0.75 | 0.0621 | 0.0024 | 0.9102 | 0.0347 | 0.1055 | 0.0016 | 679.6  | 83.3  | 657.1 | 18.5 | 646.4 | 9.2 | 98% |
| GTS12-24           | 26  | 160  | 969  | 0.16 | 0.0538 | 0.0025 | 0.2510 | 0.0105 | 0.0339 | 0.0004 | 364.9  | 101.8 | 227.4 | 8.5  | 215.1 | 2.6 | 94% |
| GTS12-25           | 31  | 86   | 827  | 0.10 | 0.0526 | 0.0034 | 0.3213 | 0.0180 | 0.0449 | 0.0015 | 322.3  | 150.0 | 282.9 | 13.9 | 283.1 | 9.3 | 99% |
| GTS12-27           | 36  | 202  | 595  | 0.34 | 0.0563 | 0.0027 | 0.3212 | 0.0133 | 0.0413 | 0.0005 | 464.9  | 100.9 | 282.8 | 10.2 | 260.8 | 3.2 | 91% |
| GTS12-28           | 31  | 144  | 925  | 0.16 | 0.0516 | 0.0027 | 0.2510 | 0.0119 | 0.0354 | 0.0005 | 333.4  | 118.5 | 227.4 | 9.7  | 224.1 | 2.8 | 98% |
| GTS12-29           | 24  | 120  | 830  | 0.15 | 0.0528 | 0.0028 | 0.2490 | 0.0124 | 0.0340 | 0.0005 | 320.4  | 122.2 | 225.8 | 10.1 | 215.4 | 2.8 | 95% |
| GTS12-30           | 80  | 507  | 476  | 1.07 | 0.0578 | 0.0026 | 0.5001 | 0.0201 | 0.0638 | 0.0007 | 520.4  | 98.1  | 411.7 | 13.6 | 398.6 | 4.5 | 96% |
| GTS12-31           | 55  | 420  | 1510 | 0.28 | 0.0506 | 0.0019 | 0.2309 | 0.0080 | 0.0331 | 0.0003 | 233.4  | 52.8  | 210.9 | 6.6  | 209.7 | 1.9 | 99% |
| GTS12-32           | 36  | 166  | 746  | 0.22 | 0.0534 | 0.0024 | 0.2918 | 0.0124 | 0.0392 | 0.0004 | 346.4  | 101.8 | 259.9 | 9.7  | 247.8 | 2.6 | 95% |
| <b>Miba pluton</b> |     |      |      |      |        |        |        |        |        |        |        |       |       |      |       |     |     |
| <b>CX1717</b>      |     |      |      |      |        |        |        |        |        |        |        |       |       |      |       |     |     |
| CX17-01            | 49  | 500  | 1136 | 0.44 | 0.0549 | 0.0027 | 0.2607 | 0.0128 | 0.0341 | 0.0010 | 405.6  | 111.1 | 235.3 | 10.3 | 216.5 | 6.1 | 91% |
| CX17-03            | 54  | 500  | 1319 | 0.38 | 0.0509 | 0.0026 | 0.2453 | 0.0123 | 0.0348 | 0.0010 | 235.3  | 113.9 | 222.7 | 10.0 | 220.5 | 6.4 | 98% |
| CX17-05            | 26  | 247  | 423  | 0.58 | 0.0557 | 0.0036 | 0.3411 | 0.0208 | 0.0443 | 0.0013 | 442.6  | 138.0 | 298.0 | 15.7 | 279.7 | 8.2 | 93% |
| CX17-06            | 51  | 504  | 1202 | 0.42 | 0.0540 | 0.0028 | 0.2576 | 0.0129 | 0.0345 | 0.0010 | 368.6  | 113.9 | 232.8 | 10.4 | 218.9 | 6.3 | 93% |
| CX17-08            | 61  | 574  | 1483 | 0.39 | 0.0535 | 0.0026 | 0.2546 | 0.0122 | 0.0346 | 0.0010 | 350.1  | 111.1 | 230.3 | 9.9  | 219.3 | 6.5 | 95% |
| CX17-09            | 46  | 474  | 1069 | 0.44 | 0.0473 | 0.0027 | 0.2349 | 0.0136 | 0.0357 | 0.0011 | 64.9   | 129.6 | 214.2 | 11.2 | 226.4 | 6.6 | 94% |
| CX17-10            | 52  | 761  | 1119 | 0.68 | 0.0534 | 0.0029 | 0.2373 | 0.0120 | 0.0325 | 0.0009 | 346.4  | 122.2 | 216.2 | 9.9  | 206.2 | 5.9 | 95% |



|         |     |     |      |      |        |        |        |        |        |        |        |       |        |      |        |      |     |
|---------|-----|-----|------|------|--------|--------|--------|--------|--------|--------|--------|-------|--------|------|--------|------|-----|
| CX17-13 | 47  | 669 | 996  | 0.67 | 0.0492 | 0.0028 | 0.2258 | 0.0126 | 0.0334 | 0.0010 | 166.8  | 133.3 | 206.7  | 10.4 | 211.7  | 6.2  | 97% |
| CX17-14 | 49  | 388 | 1257 | 0.31 | 0.0525 | 0.0027 | 0.2416 | 0.0119 | 0.0337 | 0.0010 | 305.6  | 116.7 | 219.7  | 9.7  | 213.6  | 6.1  | 97% |
| CX17-15 | 15  | 163 | 213  | 0.77 | 0.0639 | 0.0060 | 0.3695 | 0.0297 | 0.0458 | 0.0017 | 736.7  | 200.0 | 319.3  | 22.0 | 289.0  | 10.2 | 90% |
| CX17-16 | 115 | 686 | 1295 | 0.53 | 0.0537 | 0.0030 | 0.2538 | 0.0130 | 0.0348 | 0.0010 | 366.7  | 123.1 | 229.7  | 10.6 | 220.7  | 6.4  | 96% |
| CX17-19 | 112 | 135 | 673  | 0.20 | 0.0709 | 0.0028 | 1.5692 | 0.0619 | 0.1599 | 0.0046 | 953.7  | 79.6  | 958.1  | 24.5 | 956.3  | 25.3 | 99% |
| CX17-21 | 49  | 385 | 1302 | 0.30 | 0.0489 | 0.0026 | 0.2172 | 0.0110 | 0.0324 | 0.0009 | 142.7  | 122.2 | 199.6  | 9.2  | 205.7  | 5.9  | 96% |
| CX17-22 | 62  | 518 | 1603 | 0.32 | 0.0516 | 0.0023 | 0.2307 | 0.0103 | 0.0323 | 0.0009 | 333.4  | 105.5 | 210.7  | 8.5  | 204.7  | 5.6  | 97% |
| CX17-23 | 58  | 551 | 1455 | 0.38 | 0.0541 | 0.0029 | 0.2408 | 0.0128 | 0.0321 | 0.0010 | 376.0  | 123.1 | 219.1  | 10.4 | 203.7  | 5.9  | 92% |
| CX17-24 | 74  | 680 | 1807 | 0.38 | 0.0466 | 0.0024 | 0.2079 | 0.0104 | 0.0324 | 0.0009 | 33.4   | 113.0 | 191.8  | 8.7  | 205.5  | 5.9  | 93% |
| CX17-25 | 51  | 427 | 1309 | 0.33 | 0.0482 | 0.0024 | 0.2118 | 0.0108 | 0.0318 | 0.0010 | 109.4  | 124.1 | 195.1  | 9.1  | 201.7  | 6.0  | 96% |
| CX17-27 | 381 | 169 | 1019 | 0.17 | 0.1242 | 0.0047 | 5.4757 | 0.2084 | 0.3163 | 0.0089 | 2017.0 | 66.7  | 1896.8 | 32.7 | 1771.6 | 43.6 | 93% |
| CX17-29 | 50  | 439 | 1291 | 0.34 | 0.0500 | 0.0028 | 0.2240 | 0.0123 | 0.0324 | 0.0009 | 194.5  | 129.6 | 205.2  | 10.2 | 205.5  | 5.8  | 99% |
| CX17-31 | 66  | 625 | 1650 | 0.38 | 0.0540 | 0.0026 | 0.2465 | 0.0113 | 0.0331 | 0.0010 | 368.6  | 107.4 | 223.7  | 9.2  | 209.9  | 6.0  | 93% |
| CX17-32 | 32  | 268 | 814  | 0.33 | 0.0503 | 0.0030 | 0.2337 | 0.0131 | 0.0338 | 0.0010 | 209.3  | 140.7 | 213.2  | 10.8 | 214.4  | 6.4  | 99% |
| CX17-33 | 51  | 429 | 1266 | 0.34 | 0.0522 | 0.0027 | 0.2450 | 0.0119 | 0.0340 | 0.0010 | 294.5  | 116.7 | 222.5  | 9.7  | 215.2  | 6.2  | 96% |
| CX17-35 | 68  | 682 | 1763 | 0.39 | 0.0520 | 0.0025 | 0.2363 | 0.0110 | 0.0326 | 0.0009 | 283.4  | 109.2 | 215.4  | 9.0  | 207.0  | 5.8  | 96% |
| CX17-37 | 40  | 352 | 993  | 0.35 | 0.0516 | 0.0033 | 0.2501 | 0.0145 | 0.0352 | 0.0010 | 333.4  | 143.5 | 226.7  | 11.8 | 223.1  | 6.4  | 98% |
| CX17-38 | 33  | 401 | 751  | 0.53 | 0.0528 | 0.0033 | 0.2438 | 0.0150 | 0.0335 | 0.0010 | 320.4  | 144.4 | 221.6  | 12.3 | 212.2  | 6.4  | 95% |
| CX17-40 | 55  | 536 | 1338 | 0.40 | 0.0521 | 0.0030 | 0.2533 | 0.0141 | 0.0351 | 0.0010 | 300.1  | 131.5 | 229.2  | 11.4 | 222.6  | 6.4  | 97% |
| CX17-41 | 51  | 494 | 1132 | 0.44 | 0.0474 | 0.0032 | 0.2428 | 0.0149 | 0.0381 | 0.0012 | 77.9   | 142.6 | 220.7  | 12.2 | 241.1  | 7.3  | 91% |
| CX17-42 | 57  | 591 | 1422 | 0.42 | 0.0513 | 0.0025 | 0.2338 | 0.0114 | 0.0329 | 0.0009 | 257.5  | 112.9 | 213.3  | 9.4  | 208.9  | 5.8  | 97% |
| CX17-43 | 65  | 663 | 1593 | 0.42 | 0.0509 | 0.0025 | 0.2378 | 0.0116 | 0.0338 | 0.0010 | 239.0  | 112.9 | 216.7  | 9.5  | 214.1  | 6.0  | 98% |
| CX17-44 | 44  | 409 | 1107 | 0.37 | 0.0509 | 0.0028 | 0.2468 | 0.0133 | 0.0350 | 0.0010 | 239.0  | 128.7 | 223.9  | 10.8 | 221.7  | 6.5  | 99% |
| CX17-45 | 85  | 871 | 2054 | 0.42 | 0.0521 | 0.0025 | 0.2391 | 0.0109 | 0.0334 | 0.0010 | 287.1  | 109.2 | 217.7  | 8.9  | 211.7  | 6.1  | 97% |
| CX17-46 | 36  | 322 | 887  | 0.36 | 0.0538 | 0.0032 | 0.2395 | 0.0130 | 0.0332 | 0.0010 | 361.2  | 139.8 | 218.0  | 10.7 | 210.3  | 6.3  | 96% |
| CX17-47 | 67  | 596 | 1699 | 0.35 | 0.0507 | 0.0023 | 0.2292 | 0.0105 | 0.0325 | 0.0009 | 227.8  | 105.5 | 209.5  | 8.7  | 206.3  | 5.8  | 98% |

|         |    |     |      |      |        |        |        |        |        |        |       |       |       |      |       |     |     |
|---------|----|-----|------|------|--------|--------|--------|--------|--------|--------|-------|-------|-------|------|-------|-----|-----|
| CX17-48 | 29 | 357 | 439  | 0.81 | 0.0564 | 0.0035 | 0.3242 | 0.0184 | 0.0426 | 0.0013 | 477.8 | 141.6 | 285.2 | 14.1 | 268.7 | 8.3 | 94% |
| CX17-49 | 59 | 489 | 1459 | 0.33 | 0.0481 | 0.0023 | 0.2231 | 0.0103 | 0.0337 | 0.0010 | 105.6 | 107.4 | 204.5 | 8.5  | 213.4 | 6.0 | 95% |
| CX17-51 | 26 | 356 | 397  | 0.90 | 0.0492 | 0.0036 | 0.2890 | 0.0205 | 0.0425 | 0.0014 | 166.8 | 153.7 | 257.8 | 16.1 | 268.2 | 8.4 | 96% |
| CX17-53 | 45 | 519 | 1056 | 0.49 | 0.0512 | 0.0032 | 0.2379 | 0.0136 | 0.0343 | 0.0010 | 255.6 | 144.4 | 216.7 | 11.2 | 217.6 | 6.4 | 99% |
| CX17-54 | 47 | 456 | 1063 | 0.43 | 0.0540 | 0.0031 | 0.3025 | 0.0256 | 0.0384 | 0.0015 | 372.3 | 129.6 | 268.3 | 19.9 | 242.9 | 9.1 | 90% |
| CX17-55 | 44 | 424 | 724  | 0.59 | 0.0487 | 0.0029 | 0.3076 | 0.0182 | 0.0460 | 0.0014 | 200.1 | 133.3 | 272.3 | 14.1 | 290.0 | 8.6 | 93% |
| CX17-57 | 29 | 339 | 650  | 0.52 | 0.0564 | 0.0038 | 0.2560 | 0.0158 | 0.0336 | 0.0010 | 477.8 | 143.5 | 231.5 | 12.8 | 213.0 | 6.4 | 91% |
| CX17-58 | 52 | 466 | 1327 | 0.35 | 0.0505 | 0.0025 | 0.2315 | 0.0112 | 0.0331 | 0.0009 | 220.4 | 114.8 | 211.4 | 9.2  | 209.6 | 5.8 | 99% |
| CX17-60 | 27 | 250 | 627  | 0.40 | 0.0519 | 0.0035 | 0.2417 | 0.0160 | 0.0345 | 0.0011 | 279.7 | 155.5 | 219.8 | 13.1 | 218.3 | 6.8 | 99% |
| CX17-61 | 45 | 476 | 1027 | 0.46 | 0.0525 | 0.0028 | 0.2486 | 0.0135 | 0.0341 | 0.0010 | 305.6 | 122.2 | 225.5 | 11.0 | 216.4 | 6.2 | 95% |
| CX17-63 | 27 | 295 | 619  | 0.48 | 0.0495 | 0.0031 | 0.2318 | 0.0141 | 0.0341 | 0.0010 | 172.3 | 150.9 | 211.7 | 11.6 | 216.3 | 6.3 | 97% |
| CX17-64 | 71 | 760 | 1739 | 0.44 | 0.0534 | 0.0026 | 0.2377 | 0.0118 | 0.0324 | 0.0010 | 346.4 | 111.1 | 216.6 | 9.7  | 205.3 | 6.1 | 94% |
| CX17-65 | 62 | 658 | 1476 | 0.45 | 0.0497 | 0.0026 | 0.2242 | 0.0116 | 0.0332 | 0.0010 | 189.0 | 124.1 | 205.4 | 9.7  | 210.4 | 6.2 | 97% |
| CX17-66 | 31 | 226 | 791  | 0.29 | 0.0488 | 0.0030 | 0.2203 | 0.0128 | 0.0330 | 0.0010 | 200.1 | 72.2  | 202.1 | 10.7 | 209.2 | 6.0 | 96% |
| CX17-69 | 68 | 721 | 1580 | 0.46 | 0.0491 | 0.0025 | 0.2269 | 0.0113 | 0.0337 | 0.0010 | 153.8 | 152.8 | 207.7 | 9.4  | 213.6 | 6.1 | 97% |
| CX17-70 | 33 | 386 | 589  | 0.66 | 0.0515 | 0.0032 | 0.2786 | 0.0172 | 0.0398 | 0.0012 | 264.9 | 172.2 | 249.6 | 13.6 | 251.6 | 7.7 | 99% |
| CX17-72 | 23 | 244 | 533  | 0.46 | 0.0517 | 0.0039 | 0.2313 | 0.0162 | 0.0334 | 0.0011 | 276.0 | 169.4 | 211.3 | 13.4 | 211.7 | 6.6 | 99% |
| CX17-73 | 44 | 489 | 979  | 0.50 | 0.0560 | 0.0032 | 0.2713 | 0.0147 | 0.0350 | 0.0010 | 453.8 | 127.8 | 243.7 | 11.7 | 221.8 | 6.5 | 90% |
| CX17-74 | 83 | 797 | 2041 | 0.39 | 0.0513 | 0.0024 | 0.2443 | 0.0110 | 0.0342 | 0.0010 | 253.8 | 112.0 | 221.9 | 8.9  | 216.8 | 6.0 | 97% |
| CX17-75 | 30 | 304 | 711  | 0.43 | 0.0540 | 0.0035 | 0.2558 | 0.0153 | 0.0344 | 0.0010 | 372.3 | 146.3 | 231.2 | 12.4 | 217.7 | 6.3 | 93% |
| CX17-76 | 80 | 773 | 1962 | 0.39 | 0.0491 | 0.0025 | 0.2371 | 0.0118 | 0.0345 | 0.0010 | 150.1 | 115.7 | 216.1 | 9.7  | 218.8 | 6.1 | 98% |
| CX17-77 | 26 | 250 | 591  | 0.42 | 0.0518 | 0.0034 | 0.2490 | 0.0151 | 0.0353 | 0.0011 | 276.0 | 150.0 | 225.7 | 12.3 | 223.8 | 6.8 | 99% |
| CX17-78 | 40 | 297 | 909  | 0.33 | 0.0557 | 0.0033 | 0.2868 | 0.0160 | 0.0372 | 0.0011 | 438.9 | 129.6 | 256.0 | 12.7 | 235.7 | 6.7 | 91% |
| CX17-80 | 82 | 914 | 1978 | 0.46 | 0.0495 | 0.0024 | 0.2337 | 0.0110 | 0.0341 | 0.0010 | 168.6 | 112.9 | 213.2 | 9.0  | 216.0 | 6.0 | 98% |

**Table S3.** Sr-Nd-Pb isotopic compositions of the Guangtoushan and Miba plutons.

| Sample No.          | Rock type             | <sup>87</sup> Rb/ <sup>86</sup> Sr | <sup>87</sup> Sr/ <sup>86</sup> Sr | <sup>87</sup> Sr/ <sup>86</sup> Sr | <sup>147</sup> Sm/ <sup>144</sup> Nd | <sup>143</sup> Nd/ <sup>144</sup> Nd | ε <sub>Nd</sub> (t) | T <sub>DM2</sub> | <sup>206</sup> Pb/ <sup>204</sup> Pb | <sup>207</sup> Pb/ <sup>204</sup> Pb | <sup>208</sup> Pb/ <sup>204</sup> Pb | <sup>206</sup> Pb/ <sup>204</sup> Pb | <sup>207</sup> Pb/ <sup>204</sup> Pb | <sup>208</sup> Pb/ <sup>204</sup> Pb |
|---------------------|-----------------------|------------------------------------|------------------------------------|------------------------------------|--------------------------------------|--------------------------------------|---------------------|------------------|--------------------------------------|--------------------------------------|--------------------------------------|--------------------------------------|--------------------------------------|--------------------------------------|
|                     |                       |                                    |                                    | initial                            |                                      |                                      |                     | Ga               |                                      |                                      |                                      | initial                              | initial                              | initial                              |
| Guangtoushan pluton |                       |                                    |                                    |                                    |                                      |                                      |                     |                  |                                      |                                      |                                      |                                      |                                      |                                      |
| GTS1501             | monzogranite          | 0.172                              | 0.706066                           | 0.7055                             | 0.1020                               | 0.512127                             | -7.4                | 1.59             | 18.1567                              | 15.5069                              | 38.0163                              | 17.58                                | 15.48                                | 37.97                                |
| GTS1502             | monzogranite          | 0.361                              | 0.706072                           | 0.7050                             | 0.1131                               | 0.512227                             | -5.7                | 1.46             | 18.0288                              | 15.5102                              | 37.9350                              | 17.35                                | 15.48                                | 37.88                                |
| GTS1504             | monzogranite          | 0.259                              | 0.706245                           | 0.7055                             | 0.1069                               | 0.512152                             | -7.0                | 1.56             | 18.0734                              | 15.5008                              | 38.0836                              | 16.98                                | 15.45                                | 38.01                                |
| GTS1505             | monzogranite          | 0.186                              | 0.707071                           | 0.7065                             | 0.0979                               | 0.511946                             | -10.8               | 1.87             | 18.0637                              | 15.5166                              | 38.1308                              | 17.43                                | 15.48                                | 38.08                                |
| GTS1507             | monzogranite          | 1.031                              | 0.712213                           | 0.7091                             | 0.0987                               | 0.511840                             | -12.9               | 2.04             | 18.3071                              | 15.5789                              | 38.5758                              | 17.56                                | 15.54                                | 38.53                                |
| GTS1508             | monzogranite          | 0.395                              | 0.708484                           | 0.7073                             | 0.1132                               | 0.512103                             | -8.1                | 1.65             | 18.4013                              | 15.5499                              | 38.5219                              | 17.68                                | 15.51                                | 38.39                                |
| GTS1509             | monzogranite          | 0.918                              | 0.710798                           | 0.7080                             | 0.1083                               | 0.512105                             | -8.0                | 1.64             | 18.2554                              | 15.5755                              | 38.5605                              | 17.05                                | 15.51                                | 38.51                                |
| GTS1510             | monzogranite          | 0.738                              | 0.709525                           | 0.7073                             | 0.1017                               | 0.512050                             | -8.9                | 1.71             | 18.0891                              | 15.4890                              | 38.2748                              | 16.83                                | 15.43                                | 38.22                                |
| GTS1503             | granite               | 0.523                              | 0.707120                           | 0.7055                             | 0.1170                               | 0.512130                             | -7.7                | 1.62             | 18.0157                              | 15.5147                              | 38.0728                              | 17.29                                | 15.48                                | 38.01                                |
| GTS1506             | granite               | 1.064                              | 0.710521                           | 0.7073                             | 0.1037                               | 0.512152                             | -6.9                | 1.56             | 18.2090                              | 15.5661                              | 38.4404                              | 17.52                                | 15.53                                | 38.39                                |
| GTS1511             | granite               | 1.426                              | 0.713045                           | 0.7087                             | 0.1165                               | 0.511999                             | -10.3               | 1.83             | 18.2723                              | 15.5648                              | 38.5409                              | 17.08                                | 15.50                                | 38.43                                |
| GTS1512             | quartz diorite        | 0.323                              | 0.708927                           | 0.7079                             | 0.1183                               | 0.512114                             | -8.1                | 1.65             | 18.2534                              | 15.5514                              | 38.6815                              | 16.98                                | 15.49                                | 38.61                                |
| GTS1513             | quartz diorite        | 0.330                              | 0.708989                           | 0.7080                             | 0.0923                               | 0.512260                             | -4.5                | 1.36             | 18.2285                              | 15.5557                              | 38.9516                              | 16.29                                | 15.46                                | 38.89                                |
| Miba pluton         |                       |                                    |                                    |                                    |                                      |                                      |                     |                  |                                      |                                      |                                      |                                      |                                      |                                      |
| CX1719              | monzogranite          | 0.638                              | 0.710399                           | 0.7085                             | 0.1023                               | 0.512043                             | -9.0                | 1.73             | 19.0098                              | 15.7207                              | 39.1576                              | 18.62                                | 15.60                                | 39.11                                |
| CX1720              | monzogranite          | 0.676                              | 0.710412                           | 0.7084                             | 0.1028                               | 0.512023                             | -9.5                | 1.76             | 19.0405                              | 15.7259                              | 39.2179                              | 18.63                                | 15.60                                | 39.17                                |
| CX1722              | monzogranite          | 0.667                              | 0.710471                           | 0.7084                             | 0.0965                               | 0.512057                             | -8.6                | 1.69             | 18.8762                              | 15.7130                              | 39.1868                              | 18.58                                | 15.58                                | 39.14                                |
| CX1717              | monzogranite porphyre | 0.215                              | 0.706680                           | 0.7060                             | 0.1061                               | 0.512132                             | -7.4                | 1.59             | 18.3836                              | 15.6394                              | 38.8408                              | 18.19                                | 15.57                                | 38.80                                |
| CX1718              | monzogranite porphyre | 0.337                              | 0.707188                           | 0.7062                             | 0.1040                               | 0.512234                             | -5.4                | 1.43             | 18.4380                              | 15.6483                              | 38.8123                              | 18.23                                | 15.58                                | 38.77                                |
| CX1721              | monzogranite porphyre | 0.343                              | 0.707370                           | 0.7063                             | 0.1049                               | 0.512229                             | -5.5                | 1.44             | 18.4908                              | 15.6501                              | 39.0044                              | 18.28                                | 15.58                                | 38.96                                |
| CX1723              | quartz diorite        | 0.388                              | 0.708653                           | 0.7075                             | 0.0982                               | 0.512106                             | -7.7                | 1.62             | 18.6329                              | 15.6821                              | 39.1361                              | 18.36                                | 15.55                                | 39.09                                |
| CX1724              | quartz diorite        | 0.402                              | 0.708877                           | 0.70766                            | 0.1008                               | 0.512148                             | -7.0                | 1.56             | 18.6331                              | 15.6825                              | 39.1357                              | 18.38                                | 15.57                                | 39.09                                |
